# Supplementary material for: Composite Collectors for the Flotation of Refractory Alkaline Rock-Type Rare-Earth Ores
Source: MDPI journal article supplement (doi:10.3390/min13081025), 2023-07-31
Supplement: s1 [file s1]

Archive with 2 entries (2 files):
- Figures S1¿CS3.pdf
- Tables S1¿CS3.pdf
