# Supplementary material for: Composite Collectors for the Flotation of Refractory Alkaline Rock-Type Rare-Earth Ores
Source: MDPI journal article supplement (doi:10.3390/min13081025), 2023-07-31
Supplement: s1 [file s1 › Figures S1¿CS3.pdf]

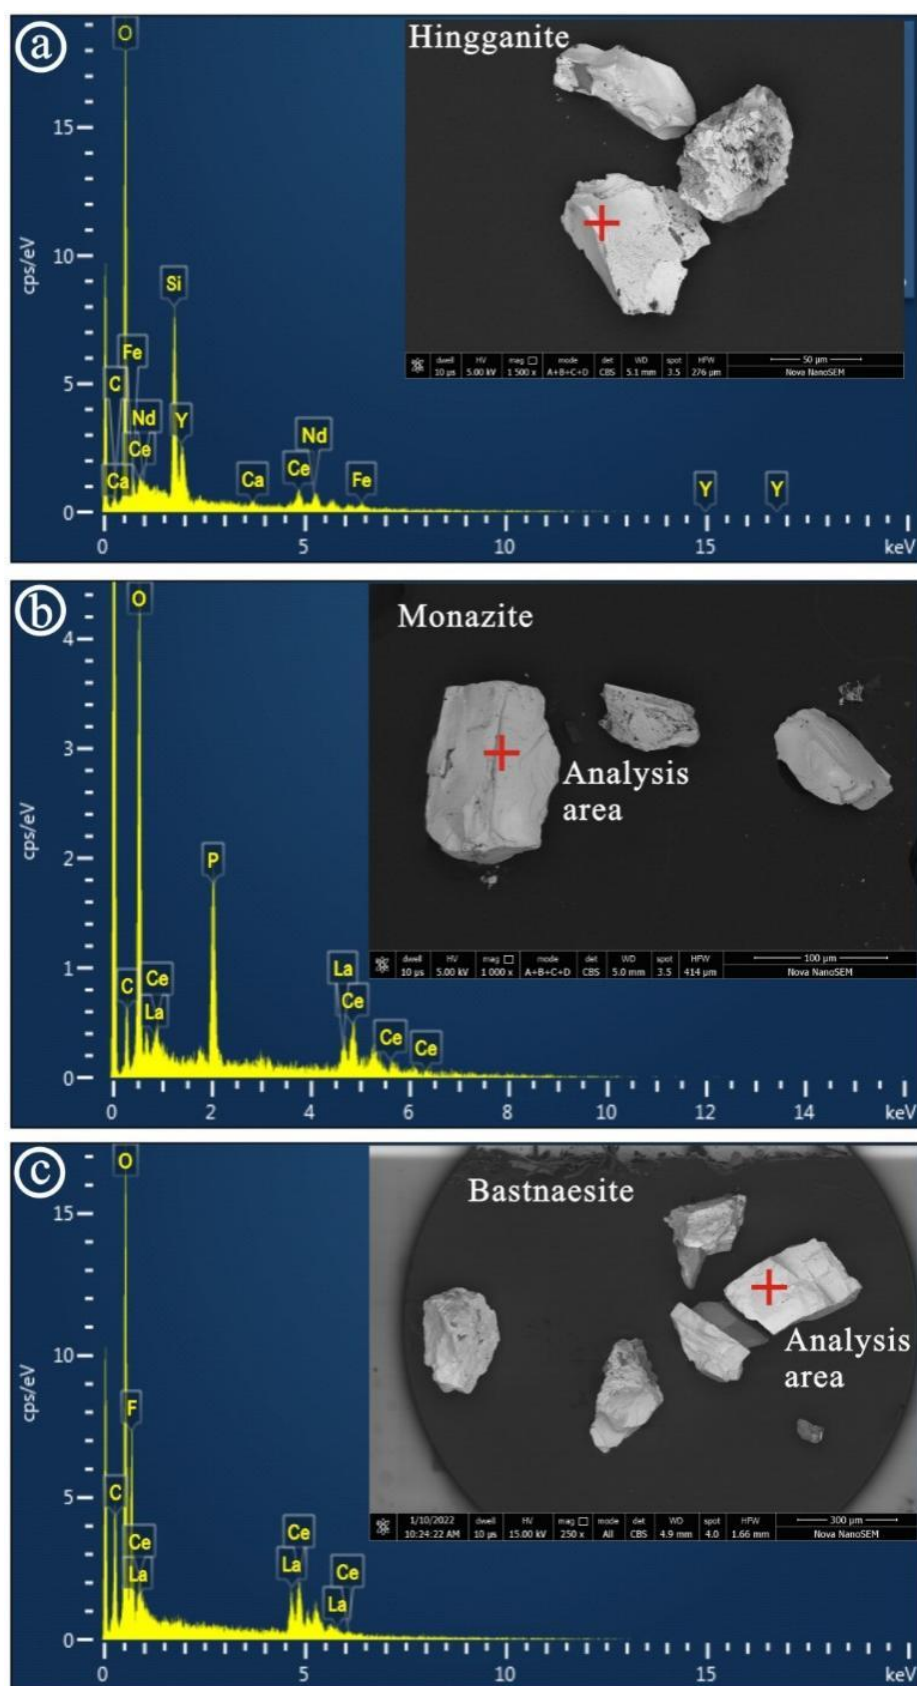

Figure S1. SEM images and energy spectra of RE minerals. (a) hingganite; (b) monazite; (c) bastnaesite.

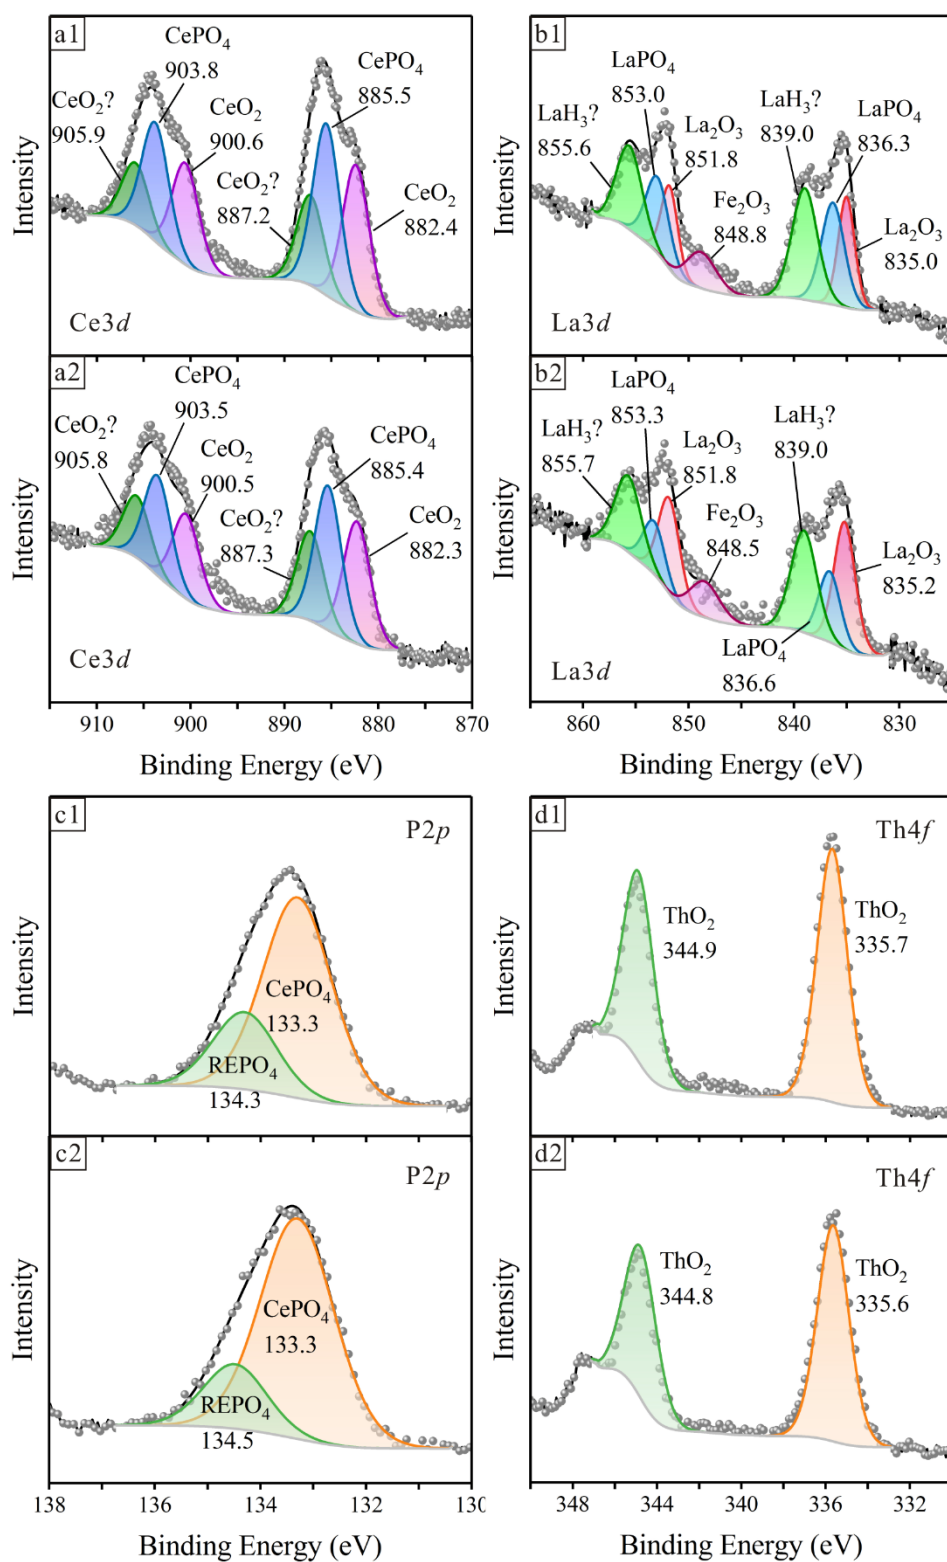

**Figure S2.** Comparison of XPS characteristics of monazite before and after flotation. (a) Ce3d; (b) La3d; (c) P2p; (d) Th4f.

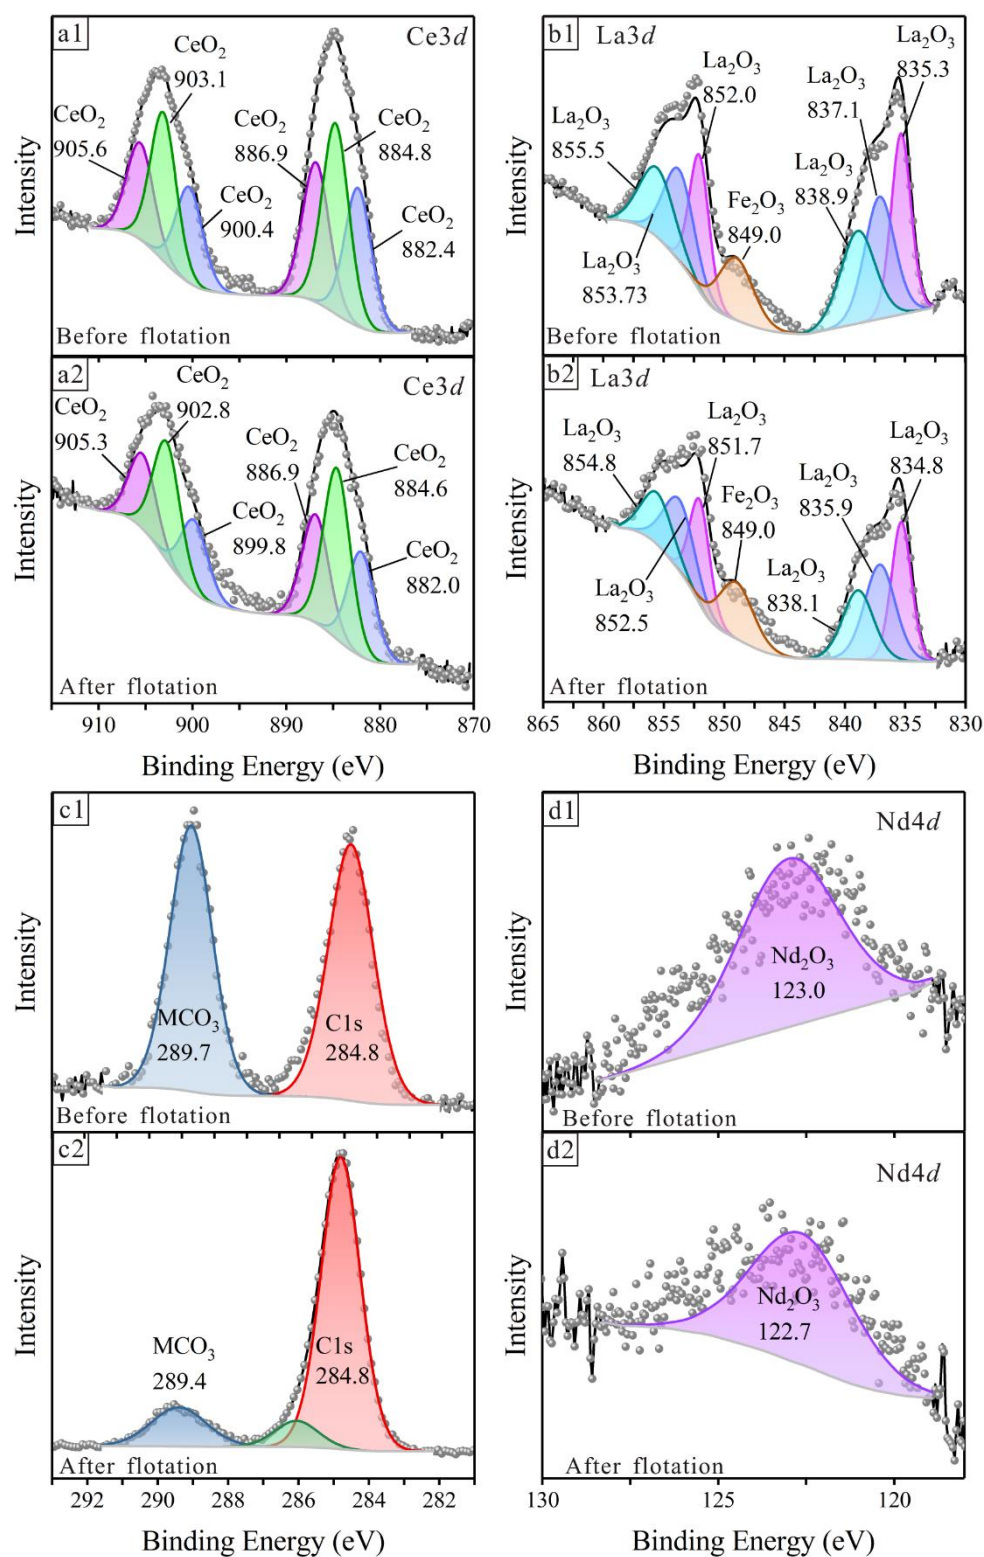

**Figure S3.** Comparison of XPS characteristics of bastnaesite before and after flotation. (a) Ce3d; (b) La3d; (c) C1s; (d) Nd4d.
