# Supplementary material for: Composite Collectors for the Flotation of Refractory Alkaline Rock-Type Rare-Earth Ores
Source: MDPI journal article supplement (doi:10.3390/min13081025), 2023-07-31
Supplement: s1 [file s1 › Tables S1¿CS3.pdf]

**Table S1.** Reagents used in the flotation tests

| Reagent type                    | Name                              | Abbreviation | Solvent          | Reagent grade     | Provider                                        |
|---------------------------------|-----------------------------------|--------------|------------------|-------------------|-------------------------------------------------|
| Carboxylic acids / Carboxylates | RA935                             | RA935        | NaOH solution    | Commercially pure | Wuhan Xianghui Ore Dressing Technology Co.,Ltd. |
|                                 | Oxidized paraffin soap            | OPS          | H <sub>2</sub> O | Commercially pure | Beining Lv Feng Chemical Plant                  |
|                                 | Refined tall oil                  | RTO          | NaOH solution    | Commercially pure | Shanghai Lisen Chemical Co.,Ltd.                |
|                                 | Tall oil fatty acid               | TOFA         | NaOH solution    | Commercially pure | Shanghai Lisen Chemical Co.,Ltd.                |
|                                 | Sodium oleate                     | NaOl         | H <sub>2</sub> O | Chemically pure   | Shanghai Macklin Biochemical Co.,Ltd.           |
|                                 | Sodium linoleate                  | NaL          | H <sub>2</sub> O | Chemically pure   | Shanghai Macklin Biochemical Co.,Ltd.           |
|                                 | Phthalic acid                     | PA           | NaOH solution    | Chemically pure   | Shanghai Macklin Biochemical Co.,Ltd.           |
| Hydroxamic acid                 | Salicylhydroxamic acid            | SHA          | NaOH solution    | Chemically pure   | Shanghai Macklin Biochemical Co.,Ltd.           |
|                                 | Octyl hydroxamic acid             | OHA          | NaOH solution    | Chemically pure   | Shanghai Macklin Biochemical Co.,Ltd.           |
|                                 | H205                              | H205         | NaOH solution    | Commercially pure | Baotou Menghua Reagents Co.,Ltd.                |
|                                 | P-tert-butyl Benzohydroxamic acid | PBA          | NaOH solution    | Commercially pure | Baotou Menghua Reagents Co.,Ltd.                |
|                                 | Alkyl hydroxamic acid             | AHA          | H <sub>2</sub> O | Commercially pure | Tieling Flotation Reagents Co.,Ltd.             |

| Reagent type     | Name                                           | Abbreviation                    | Solvent          | Reagent grade     | Provider                              |
|------------------|------------------------------------------------|---------------------------------|------------------|-------------------|---------------------------------------|
| Sulfonate        | Sodium dodecyl benzene sulfonate               | SDBS                            | H <sub>2</sub> O | Chemically pure   | Shanghai Macklin Biochemical Co.,Ltd. |
|                  | Sodium dodecyl sulfonate                       | SDS                             | H <sub>2</sub> O | Chemically pure   | Shanghai Macklin Biochemical Co.,Ltd. |
| Phosphoric acids | Bis(2-ethylhexyl)phosphate                     | P204                            | NaOH solution    | Chemically pure   | Shanghai Macklin Biochemical Co.,Ltd. |
|                  | 2-ethylhexyl phosphate mono-2-ethylhexyl ester | P507                            | NaOH solution    | Commercially pure | Wuhan Geeyyeschem Chemical Co., Ltd   |
| Other            | Sodium hydroxide                               | NaOH                            | H <sub>2</sub> O | Chemically pure   | Shanghai Macklin Biochemical Co.,Ltd. |
|                  | Sodium carbonate                               | Na <sub>2</sub> CO <sub>3</sub> | H <sub>2</sub> O | Chemically pure   | Shanghai Macklin Biochemical Co.,Ltd. |
|                  | Magnesium fluosilicate                         | MgSiF <sub>6</sub>              | H <sub>2</sub> O | Chemically pure   | Shanghai Macklin Biochemical Co.,Ltd. |
|                  | Water glass                                    | WG                              | H <sub>2</sub> O | Chemically pure   | Shanghai Macklin Biochemical Co.,Ltd. |
|                  | Ethanolamine                                   | EA                              | H <sub>2</sub> O | Chemically pure   | Shanghai Macklin Biochemical Co.,Ltd. |
|                  | Polysorbate-80                                 | Tween 80                        | H <sub>2</sub> O | Chemically pure   | Shanghai Macklin Biochemical Co.,Ltd. |
|                  | Polysorbate                                    | Tween 80                        | H <sub>2</sub> O | Chemically pure   | Shanghai Macklin Biochemical Co.,Ltd. |

**Table S2.** The specific descriptions of flotation condition tests.

| Test type        |            | Inhibitor dosage test                                                                                                             | Activator dosage test                                                                                                            | Grinding fineness test                                                                                                          |
|------------------|------------|-----------------------------------------------------------------------------------------------------------------------------------|----------------------------------------------------------------------------------------------------------------------------------|---------------------------------------------------------------------------------------------------------------------------------|
| Process          |            | One roughing, one scavenging.                                                                                                     | One roughing, two cleanings.                                                                                                     | One roughing, one scavenging, two cleanings.                                                                                    |
| Reagent dosage   | Roughing   | Na <sub>2</sub> CO <sub>3</sub> : 1 kg/t.<br>WG: 1.4/ 2.0/ 2.6/ 3.2 kg/t.<br>MgSiF <sub>6</sub> : 300 g/t.<br>Collector: 400 g/t. | Na <sub>2</sub> CO <sub>3</sub> : 1 kg/t.<br>WG: 2 kg/t.<br>MgSiF <sub>6</sub> : 300/ 600/ 900/ 1200 g/t.<br>Collector: 400 g/t. | Na <sub>2</sub> CO <sub>3</sub> : 1 kg/t.<br>WG: 2 kg/t.<br>MgSiF <sub>6</sub> : 900 g/t.<br>Collector: 400 g/t.                |
|                  | Scavenging | Collector: 200 g/t.                                                                                                               |                                                                                                                                  | Collector: 200 g/t.                                                                                                             |
|                  | Cleaning   |                                                                                                                                   | WG: 200 g/t (each cleaning).                                                                                                     |                                                                                                                                 |
| Other conditions |            | Fineness of 90% passing 0.038 mm.<br>Pulp temperature: 40 °C.<br>Pulp concentration: 30%.<br>pH: 8.6 ± 0.2.                       | Fineness of 90% passing 0.038 mm.<br>Pulp temperature: 40 °C.<br>Pulp concentration: 30%.<br>pH: 8.6 ± 0.2.                      | Fineness of 50%/ 70%/ 85%/ 90%/ 94% passing 0.038 mm.<br>Pulp temperature: 40 °C.<br>Pulp concentration: 30%.<br>pH: 8.6 ± 0.2. |

**Table S3.** Mineralogical composition of the as-prepared HIMS concentrates.

| Mineral | Aeschnite  | Albite      | Allanite   | Almandine  | Apatite    | Arfvedsonite | Bastnaesite | Calcite      | Chlorite |
|---------|------------|-------------|------------|------------|------------|--------------|-------------|--------------|----------|
| %Wt.    | 0.333      | 6.912       | 0.206      | 3.28       | 0.009      | 21.382       | 0.122       | 0.028        | 0.09     |
| Mineral | Columbite  | Fergusonite | Fluorite   | Hematite   | Hingganite | Ilmenite     | Kaolinite   | Melanotekite | Monazite |
| %Wt.    | 1.359      | 0.022       | 0.035      | 2.866      | 2.349      | 2.704        | 3.79        | 0.424        | 0.732    |
| Mineral | Orthoclase | Pyrite      | Pyrochlore | Pyrolusite | Quartz     | Rutile       | Thorite     | Titanite     | Zircon   |
| %Wt.    | 13.849     | 0.007       | 0.241      | 0.056      | 22.704     | 0.218        | 0.673       | 0.175        | 15.439   |
